# Supplementary material for: Probiotics Do Not Alter the Long-Term Stability of the Supragingival Microbiota in Healthy Subjects: A Randomized Controlled Trial
Source: Pathogens. 2021 Mar 24;10(4):391. doi: 10.3390/pathogens10040391 (PMC8064340; doi:10.3390/pathogens10040391)
Supplement: Supplementary file 1 [file pathogens-10-00391-s001.pdf]

A

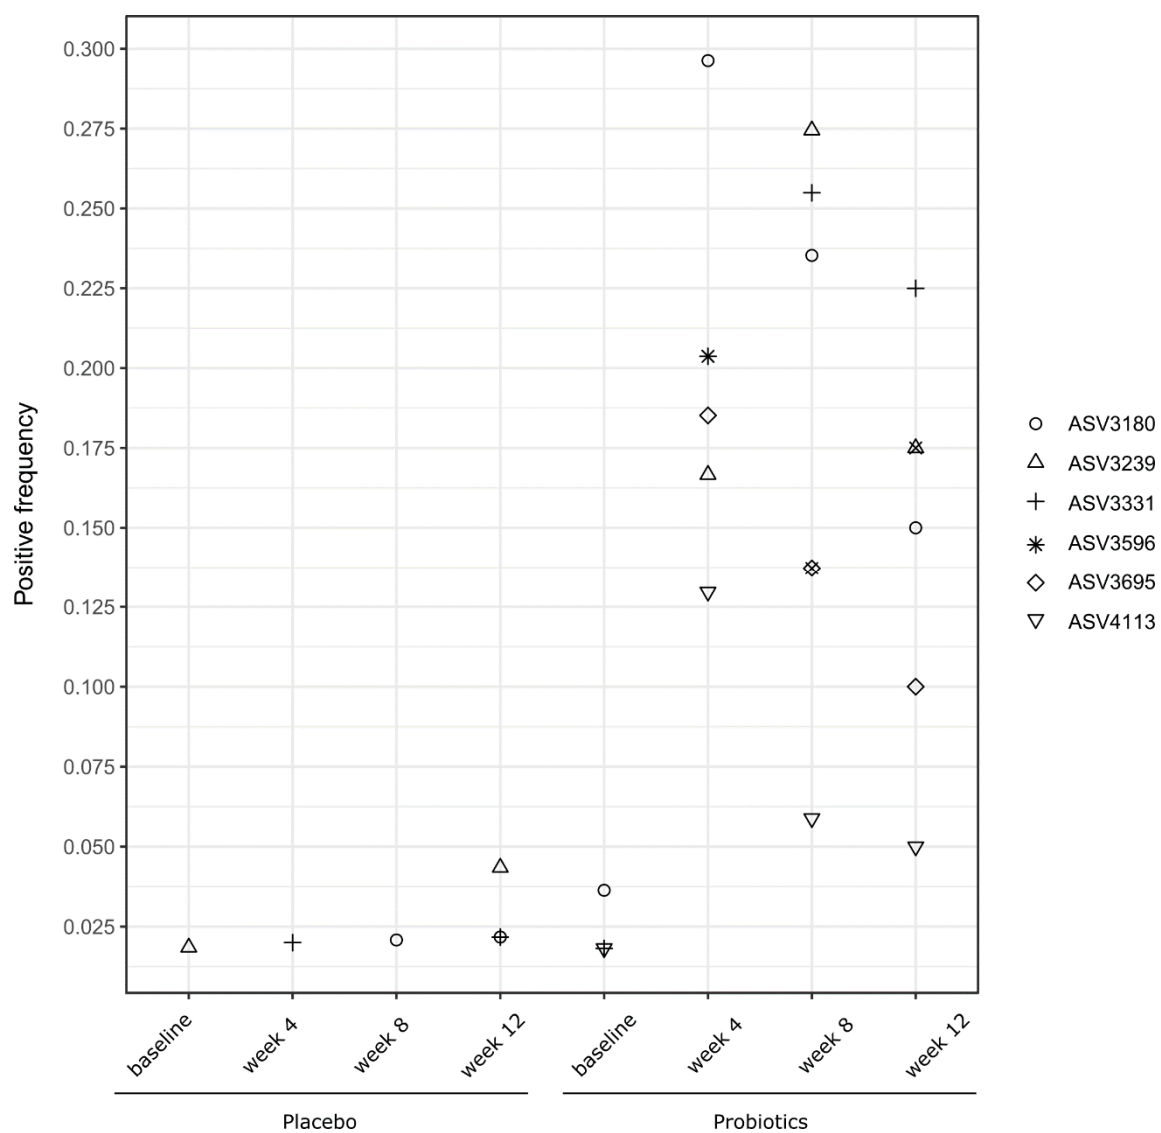

B

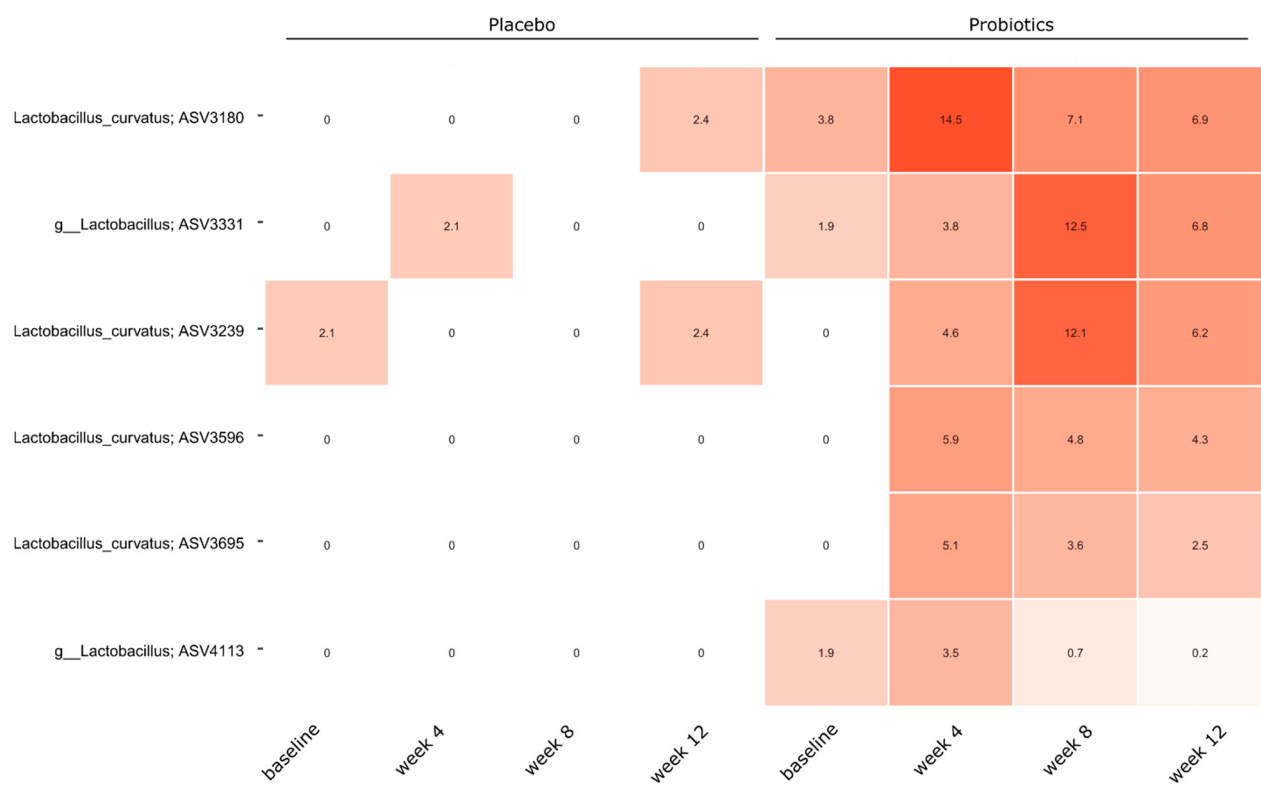

**Figure S1.** Identification of probiotic strains. Probiotic strains were identified using six reference ASVs (ASV3180, ASV3239, ASV3331, ASV3596, ASV3695 and ASV4113). **(A)** Positive frequency of each ASV in the placebo and the probiotics group at baseline, week 4, week 8 and week 12. **(B)** Relative abundance of the six ASVs expressed as percentage of total abundance of genus *Lactobacillus* in the placebo and the probiotics group at baseline, week 4, week 8 and week 12.

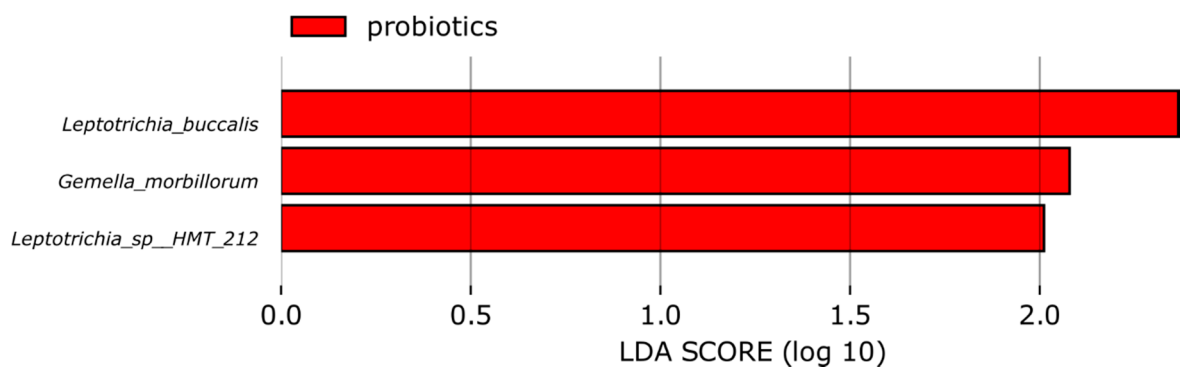

**Figure S2.** Probiotics-associated bacterial species. Linear discriminant analysis Effect Size (LEfSe) analysis demonstrating bacterial species associated with samples collected from the probiotics group versus the placebo group at week 12.
